# Supplementary material for: Investigating charge-up and fragmentation dynamics of oxygen molecules after interaction with strong X-ray free-electron laser pulses
Source: Royal Society of Chemistry journal article supplement (doi:10.1039/d2cp02408j), 2022-01-01
Supplement: d2cp02408j1.pdf [file d2cp02408j1.pdf]

# **Investigating charge-up and fragmentation dynamics of oxygen molecules after interaction with strong X- ray free-electron laser pulses**

G. Kastirke, F. Ota, D. V. Rezvan, M. S. Schöffler, M. Weller, J. Rist, R. Boll,  
N. Anders, T. M. Baumann, S. Eckart, B. Erk, A. De Fanis, K. Fehre, A. Gatton,  
S. Grundmann, P. Grychtol, A. Hartung, M. Hofmann, M. Ilchen, C. Janke, M. Kircher,  
M. Kunitski, X. Li, T. Mazza, N. Melzer, J. Montano, V. Music, G. Nalin,  
Y. Ovcharenko, A. Pier, N. Rennhack, D. E. Rivas, R. Dörner, D. Rolles, A. Rudenko,  
P. Schmidt, J. Siebert, N. Strenger, D. Trabert, I. Vela-Perez, R. Wagner, T. Weber,  
J. B. Williams, P. Ziolkowski, L. Ph. H. Schmidt, A. Czasch, Y. Tamura, N. Hara,  
K. Yamazaki, K. Hatada, F. Trinter, M. Meyer, K. Ueda, Ph. V. Demekhin, and  
T. Jahnke

**Electronic Supplementary Information (ESI)**

### Procedures for fitting the backward-forward ratio shown in Fig. 3

Here, we describe how the fitting of the experimental data, shown in Fig. 3 using Eq. (3) was performed. We first converted the ratio of the backward to forward intensities  $\eta_k(R)$  to  $\eta_k(E_{\text{KER}})$  using Eq. (1). The averaged values of the photoelectron kinetic energies  $\varepsilon$  for each channel were converted to photoelectron momenta  $k = (2\langle\varepsilon\rangle)^{1/2}$  in atomic units (a.u.). The input parameters are summarized in Table S1.

**Table S1:** The input parameters used in the fittings for Fig. 3.

| $\varepsilon$ (eV) | Channel                                                                   | $\langle\varepsilon\rangle$ (eV) | $k$<br>(a.u.) | $R_{\text{eq}}$<br>(a.u.) | $(z_l, z_r)$ | $(z_l', z_r')$ |
|--------------------|---------------------------------------------------------------------------|----------------------------------|---------------|---------------------------|--------------|----------------|
| 55-80              | $\text{O}^{1+} + \text{O}^{1+} \rightarrow \text{O}^{2+} + \text{O}^{3+}$ | 67.5                             | 2.23          | 2.28                      | (1, 1)       | (2, 3)         |
| 80-110             | $\text{O}^{2+} + \text{O}^{1+} \rightarrow \text{O}^{2+} + \text{O}^{3+}$ | 95.0                             | 2.64          | 2.28                      | (2, 1)       | (2, 3)         |

For the fitting procedure using  $\eta_k(E_{\text{KER}})$ , we assumed the coefficients  $a_k(E_{\text{KER}})$ ,  $b_k(E_{\text{KER}})$ , and the back-scattering phases  $\varphi_k^{\text{Or}}(\pi)$  as constant fitting parameters, as described in the main text. For the main channel with electron energies  $\varepsilon = 80\text{-}110$  eV, we fully optimized these three parameters by least-square fitting with equal weight for all data points provided by the experiment. We used a KER fitting range of  $E_{\text{KER}} = 45\text{-}62$  eV.

For the satellite channel with electron energies  $\varepsilon = 55\text{-}80$  eV, we optimized  $\eta_k(E_{\text{KER}})$  and  $\varphi_k^{\text{Or}}(\pi)$  by least-square fitting with equal weight for all experimental data points. Parameter  $a_k(E_{\text{KER}})$  was manually optimized due to its too strong correlations with  $\eta_k(E_{\text{KER}})$  and  $\varphi_k^{\text{Or}}(\pi)$ . We used a KER fitting range of  $E_{\text{KER}} = 40\text{-}60$  eV.

The optimized values of the fitting parameters are displayed in Table S2.

**Table S2:** The optimal fitting parameters for Fig. 3 with the fitting ranges of  $E_{\text{KER}} = 40\text{-}60$  eV for  $\varepsilon = 55\text{-}80$  eV and  $E_{\text{KER}} = 45\text{-}62$  eV for  $\varepsilon = 80\text{-}110$  eV.

| $\varepsilon$ (eV) | Channel                                                                   | $a_k(E_{\text{KER}})$ | $b_k(E_{\text{KER}})$ | $\varphi_k^{\text{Or}}(\pi)$ |
|--------------------|---------------------------------------------------------------------------|-----------------------|-----------------------|------------------------------|
| 55-80              | $\text{O}^{1+} + \text{O}^{1+} \rightarrow \text{O}^{2+} + \text{O}^{3+}$ | -0.80                 | $0.85 \pm 0.04$       | $-7.80 \pm 0.24$             |
| 80-110             | $\text{O}^{2+} + \text{O}^{1+} \rightarrow \text{O}^{2+} + \text{O}^{3+}$ | $-0.62 \pm 0.22$      | $0.84 \pm 0.04$       | $4.65 \pm 0.32$              |

In order to check the sensitivity of the fitting results on the fitting range, we also performed the

same fitting procedures extending the fitting range to  $E_{\text{KER}} = 40\text{-}65$  eV for both,  $\varepsilon = 55\text{-}80$  eV and  $\varepsilon = 80\text{-}110$  eV. The resulting ratio of the backward to forward intensities  $\eta_k(E_{\text{KER}})$  and optimal parameters are displayed in Fig. S1 and Table S3, respectively.

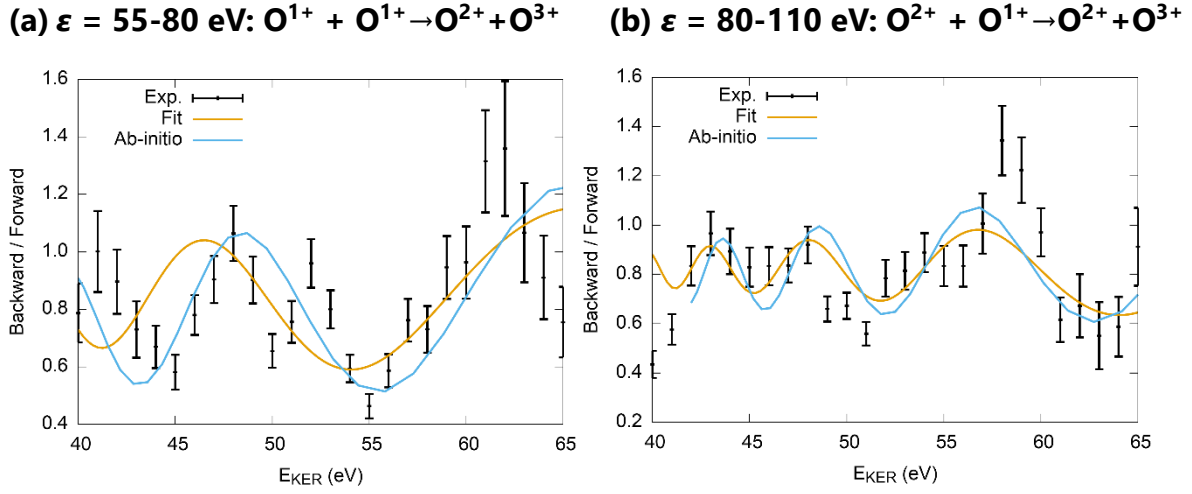

**Fig. S1:** Comparison between the experimental backward-forward ratios (symbols with error bars), measured for the  $\text{O}^{3+} + \text{O}^{2+}$  final charge state and the photoelectron kinetic-energy ranges of: (a)  $\varepsilon = 55\text{-}80$  eV and (b)  $\varepsilon = 80\text{-}110$  eV. We used the extended fitting range of  $E_{\text{KER}} = 40\text{-}65$  eV for both,  $\varepsilon = 55\text{-}80$  eV and  $\varepsilon = 80\text{-}110$  eV. The fitted ratios (orange) and the *ab initio* theoretical results (blue) represent individual contributions from the main channel  $\text{O}^{1+} + \text{O}^{2+} \rightarrow \text{O}^{3+} + \text{O}^{2+}$  in panel (b) and from the satellite channel  $\text{O}^{1+} + \text{O}^{1+} \rightarrow \text{O}^{3+} + \text{O}^{2+}$  in panel (a). To facilitate comparison with the experiment, the *ab initio* ratios include a constant background of +0.5.

**Table S3:** The optimal fitting parameters for Fig. S1 with the extended fitting range of  $E_{\text{KER}} = 40\text{-}65$  eV.

| $\varepsilon$ (eV) | Channel                                                                   | $a_k(E_{\text{KER}})$ | $b_k(E_{\text{KER}})$ | $\varphi_k^{\text{Or}} (\pi)$ |
|--------------------|---------------------------------------------------------------------------|-----------------------|-----------------------|-------------------------------|
| 55-80              | $\text{O}^{1+} + \text{O}^{1+} \rightarrow \text{O}^{2+} + \text{O}^{3+}$ | -0.80                 | $0.84 \pm 0.04$       | $-8.17 \pm 0.26$              |
| 80-110             | $\text{O}^{2+} + \text{O}^{1+} \rightarrow \text{O}^{2+} + \text{O}^{3+}$ | $-0.52 \pm 0.18$      | $0.83 \pm 0.04$       | $4.46 \pm 0.39$               |

Comparing Figs. 3 and S1 as well as Tables S2 and S3 shows that  $\eta_k(E_{\text{KER}})$  is not very sensitive to the fitting range. In both cases,  $\eta_k(E_{\text{KER}})$  well reproduces the overall trend of the experimental and theoretical *ab initio* ratios in the given fitting range. Any discrepancies likely stem from our oversimplified fitting model: Our straightforward approach is based on the analytic expression derived in the single-scattering wave approximation (multiple-scattering contributions are omitted), and it assumes that all free parameters of the fitting are fixed

numbers and not energy-dependent. However, this simple approximation is sufficiently powerful to distinguish the main and satellite channels unambiguously, and it can capture the main effects as the *ab initio* calculation, as we emphasized in the main text.
